# Supplementary material
Source: publisher figshare collection journal article supplement (https://sage.figshare.com/ndownloader/files/13569533)

Appendix. Usability, usefulness, and desirability ratings for each item. On the evaluation form, the ________ was filled in with the name of the specific device that the VT were assessing.
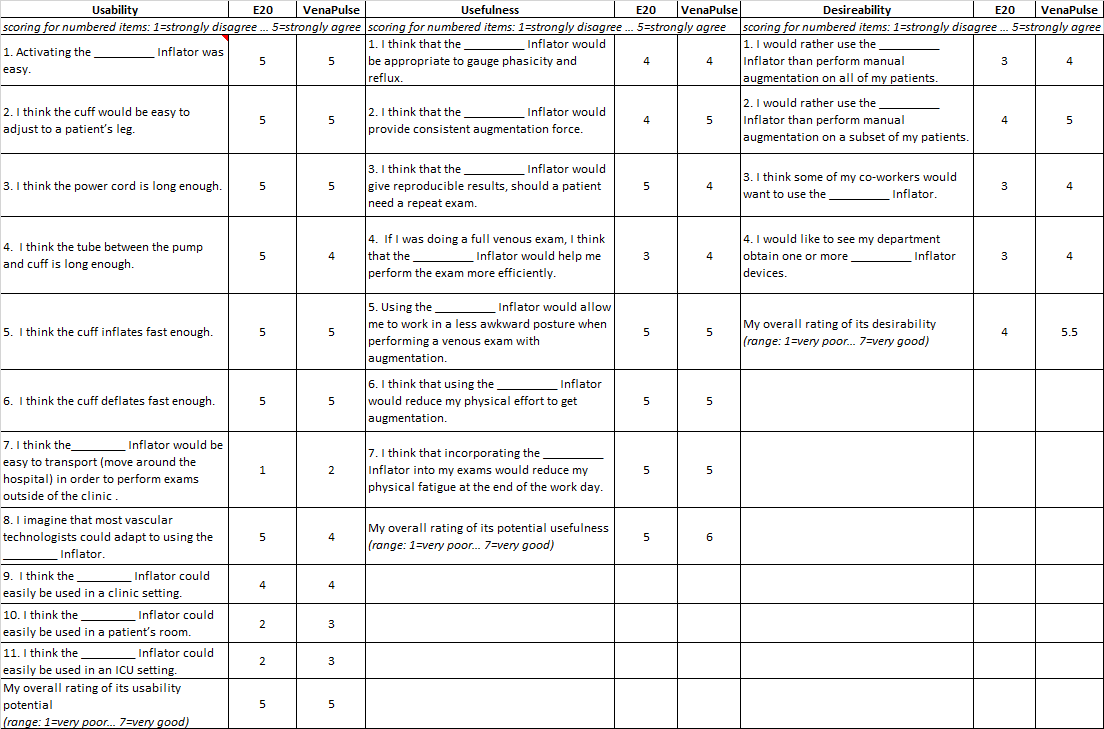

Supplement: Supplementary file 1 [file 13569533]
